# Supplementary material for: 13C and 15N allocations of two alpine species from early and late snowmelt locations reflect their different growth strategies
Source: PubMed Central journal article supplement — J Exp Bot. 2009 Apr 28;60(9):2725–35. doi: 10.1093/jxb/erp128 (PMC2692016; doi:10.1093/jxb/erp128), 2009-04-28

# **$^{13}\text{C}$ and $^{15}\text{N}$ allocations of two alpine species from early and late snowmelt locations reflect their different growth strategies**

Florence Baptist, Guillaume Tcherkez, Serge Aubert, Jean-Yves Pontailler, Philippe Choler  
Salvador Nogués.

## **Supplementary materials**

**Table S1** Labelling-derived  $^{13}\text{C}$  mass ( $\gamma^{13}\text{C}_M$ ) at each chase time (mg  $^{13}\text{C}$ ) for *K. myosuroides* and *C. foetida*. See equation 6 for calculations and text for statistical details. Values are the mean  $\pm$  se (n=3). Different letters indicate significant differences between chase times ( $P < 0.05$ ).

| Chase time      | <i>K. myosuroides</i>    | <i>C. foetida</i>        |
|-----------------|--------------------------|--------------------------|
| T <sub>0</sub>  | 1.28 (0.12) <sup>a</sup> | 1.36 (0.22) <sup>a</sup> |
| T <sub>1</sub>  | 0.95 (0.02) <sup>b</sup> | 0.97 (0.09) <sup>a</sup> |
| T <sub>3</sub>  | 0.80 (0.09) <sup>b</sup> | 1.13 (0.14) <sup>a</sup> |
| T <sub>11</sub> | 0.63 (0.05) <sup>b</sup> | 0.94 (0.13) <sup>a</sup> |

## Figure S1

Net leaf CO<sub>2</sub> assimilation per g DW of *Kobresia myosuroides* (black circle) and *Carex foetida* (white circle) in relation to PAR (Photosynthetic Active Radiation). Net leaf CO<sub>2</sub> assimilation at saturating light reached  $1755.5 \pm 1097.7$  ng C g<sup>-1</sup> leaf DW s<sup>-1</sup> and  $2660.2 \pm 93.3$  ngC g<sup>-1</sup> leaf DW s<sup>-1</sup> for *Kobresia myosuroides* and *Carex foetida* respectively. Values are the mean  $\pm$  se (n = 3).

An open-flow photosynthesis system (model 6400, LI-COR, Nebraska, USA) equipped with a CO<sub>2</sub> controller (CO<sub>2</sub> concentration equalled 400 ppm) was used to measure the light–response curves of *Carex foetida* and *Kobresia myosuroides* under constant temperature and humidity in July 2004. The system was maintained in a closed thermostated chamber, and the leaf temperature averaged  $\pm 20^\circ\text{C}$ .

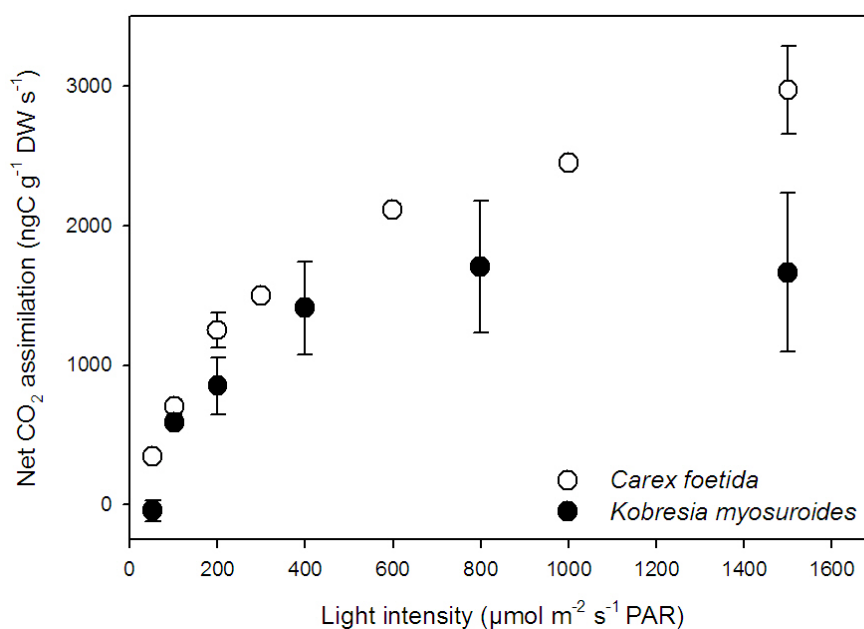

**Figure S2** Labelling-derived  $^{13}\text{C}$  content ( $\gamma^{13}\text{C}$ ,  $\mu\text{g }^{13}\text{C g}^{-1}\text{ DW}$ ) (a-b), labelling-derived  $^{13}\text{C}$  flux ( $\gamma^{13}\text{C}_R$ ,  $\mu\text{g }^{13}\text{C g}^{-1}\text{ DW h}^{-1}$ ) (c-d) and labelling-derived  $^{13}\text{C}$  mass ( $\gamma^{13}\text{C}_M$ ,  $\mu\text{g }^{13}\text{C}$ ) (e-f) in leaves and new and old roots of *K. myosuroides* and *C. foetida* following pulse labelling. Inlet graphs: cumulative labelling-derived  $^{13}\text{C}$  mass ( $\mu\text{g }^{13}\text{C}$ ) respired by the leaves and new and old roots of *K. myosuroides* (e) and *C. foetida* (f) following pulse labelling. Leaves: white circle, new roots: white square, old roots: black square. All X-axes show the time elapsed since pulse labelling (in days). Values are the mean  $\pm$  se (n=3).

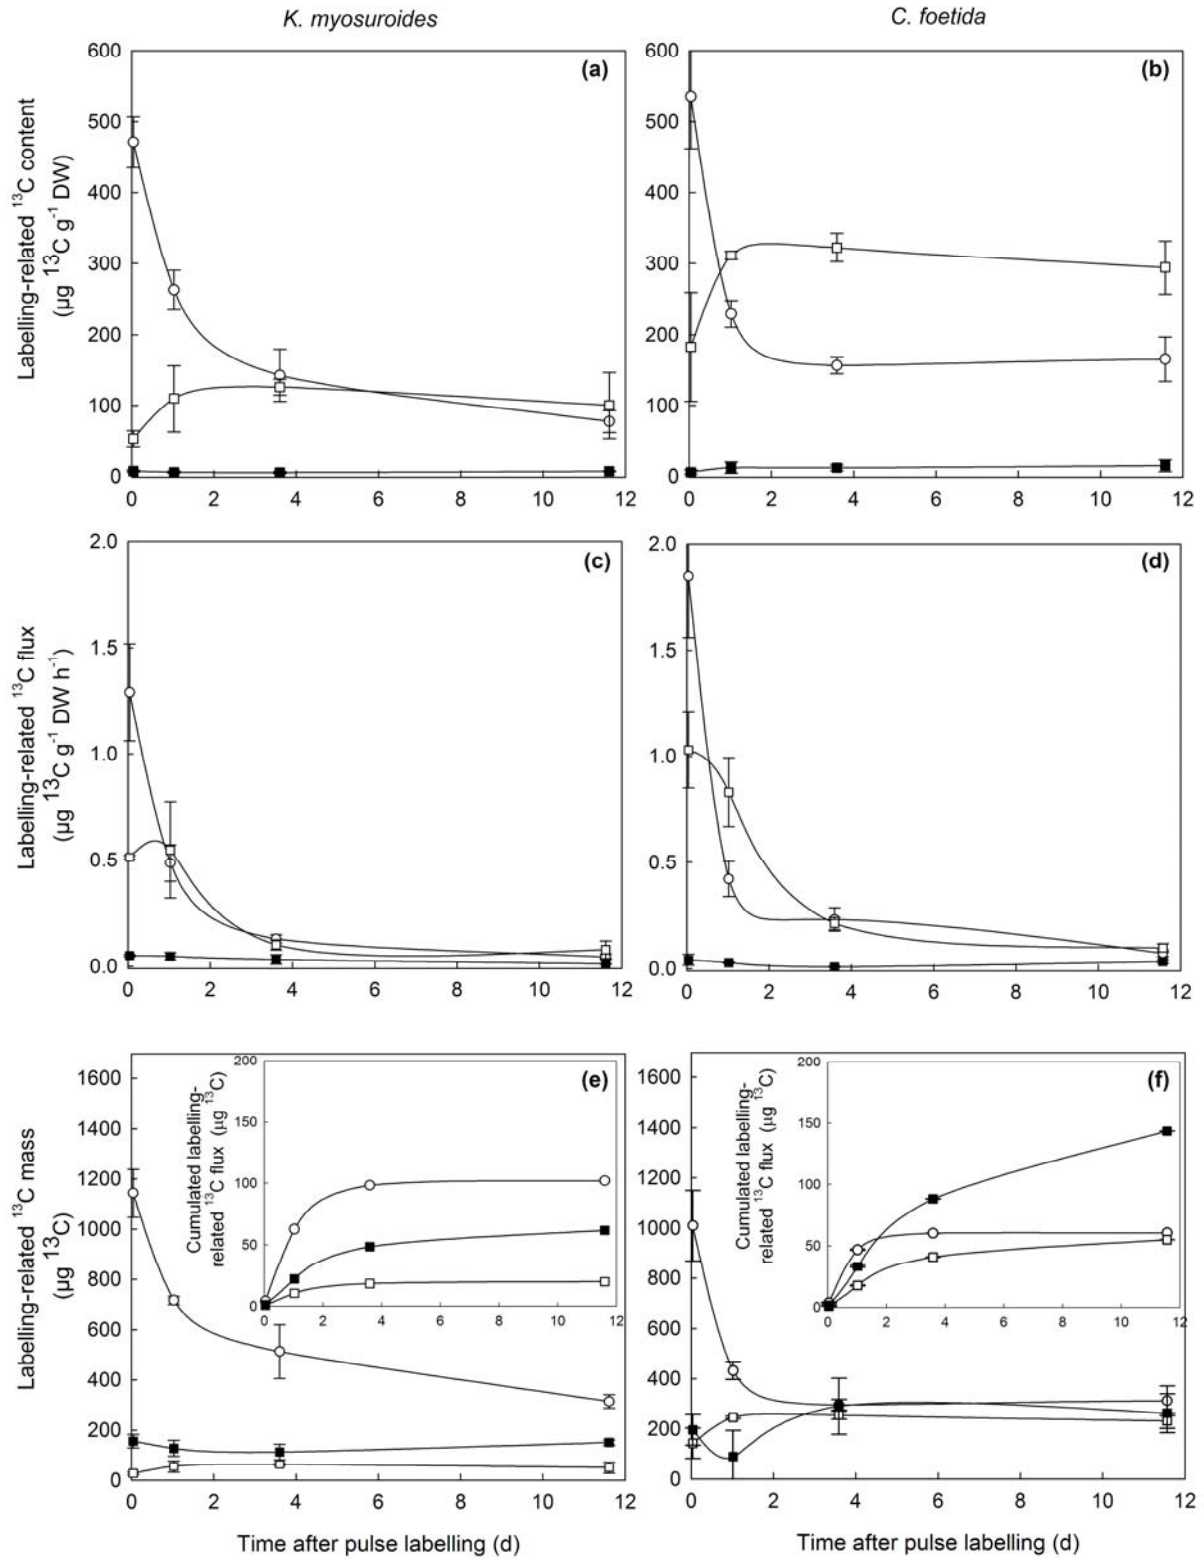

Supplement: erp128_1.pdf [file erp128_1.pdf]
